# Supplementary material for: Multiport logic operations triggered by protonation—a trisphenanthroline as a 3-input AND–NOR–OR circuit
Source: Royal Society of Chemistry journal article supplement (doi:10.1039/b920959j), 2010-01-01
Supplement: b920959j.pdf [file b920959j.pdf]

*Electronic Supplementary Information (ESI)*

## **Multiport logic operations triggered by protonation - a trisphenanthroline as a 3-Input AND – NOR – OR circuit**

**Michael Schmittel,\* Prasenjit Mal, Alejandra de los Rios**

*Center of Micro and Nanochemistry and Engineering, Organische Chemie I, Universität Siegen, Adolf-Reichwein Str. 2, D-57068 Siegen, Germany*

*E-mail: [schmittel@chemie.uni-siegen.de](mailto:schmittel@chemie.uni-siegen.de)*

*Fax: (+49) 271-740-3270*

**Chart S1.** Compounds used for the present study.

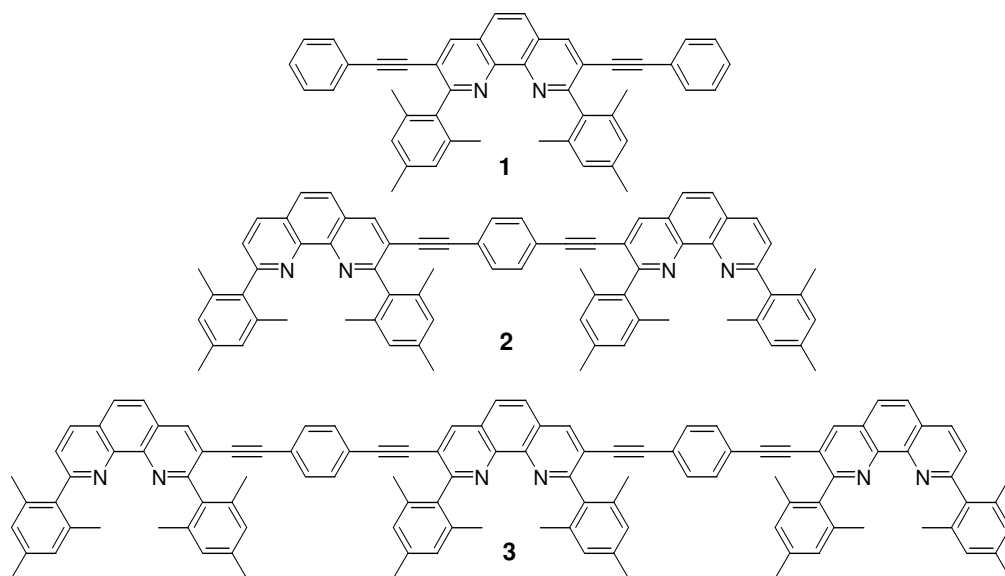

## Experimental:

**General.**  $^1\text{H}$  NMR and  $^{13}\text{C}$  NMR spectra were measured on a Bruker Avance 400 (400 MHz). NMR analysis was conducted at room temperature in deuterated solvents. Positive ESI-MS spectra were recorded on the LCQ Deca Thermo Quest instrument, scanning over the  $m/z$  range 200-4000. Binding constants were calculated by using  $\text{CH}_2\text{Cl}_2$ -MeOH (4:1) as the solvent. In a typical run, 2.000 mL of a  $1.0 \times 10^{-5}$  M solution of the mixture of phenanthroline was taken and a solution of methanesulfonic acid ( $1.0 \times 10^{-3}$  M) was added in small portions (5.00  $\mu\text{L}$ ). Absorption spectra were recorded at 25.0 ( $\pm 0.1$ )  $^\circ\text{C}$  taking into account the wavelength region from 250 nm to 700 nm. Fluorescence spectra were recorded at 25.0 ( $\pm 0.1$ )  $^\circ\text{C}$  taking into account the wavelength region from 350 nm to 700 nm. Subsequently, binding affinities were determined using the SPECFIT/32<sup>TM</sup>  $^1$ global analysis system by Spectrum Software Associates (Marlborough, MA). The SPECFIT program analyzes equilibrium data sets using singular value decomposition and linear regression modeling by the Levenberg-Marquardt method to determine cumulative binding constants. UV/Visible and Fluorescence spectra were recorded on a Varian Cary 100 Bio UV/visible Spectrometer and Varian Cary Eclipse Fluorescence Spectrometer, respectively. For fluorescence quantum yield

<sup>1</sup> a) H. Gampp, M. Maeder, C. J. Meyer and A. D. Zuberbühler, *Talanta*, 1985, **32**, 257; b) H. Gampp, M. Maeder, C. J. Meyer and A. D. Zuberbühler, *Talanta*, 1986, **33**, 943.

determination quininine sulphate was used as the standard ( $\Phi_{\text{Fl}} = 0.54$  in 1N  $\text{H}_2\text{SO}_4$ , Irradiation wavelength was 350 nm).

**Synthesis.** Chart S1 depicts the three phenanthrolines **1-3** investigated in the present study. Synthesis of compounds **2** and **3** has been published earlier by our group.<sup>2</sup> In Scheme S1, the preparation of **1** is described. Sonogashira coupling<sup>3</sup> of iodobenzene and 3,8-diethynyl-2,9-dimesityl-[1,10]-phenanthroline<sup>2</sup> in presence of Pd(0) as catalyst led to formation of **1**.

**Scheme S1.** Synthesis of **1**.

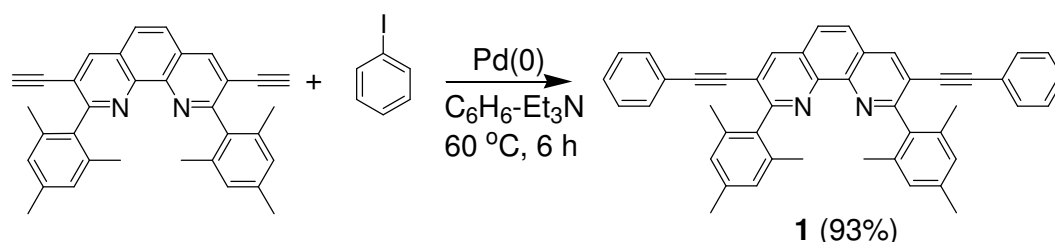

**Procedure for the synthesis of 2,9-bis(phenylethynyl)-3,8-dimesityl-[1,10]-phenanthroline (1).** Iodobenzene (0.93 g, 4.6 mmol), 3,8-diethynyl-2,9-dimesityl-[1,10]-phenanthroline (0.21 g, 0.45 mmol)<sup>2</sup>,  $\text{Pd}(\text{PPh}_3)_4$  (0.1 g, 0.09 mmol) were suspended in benzene (15.0 mL) and triethylamine (7.5 mL) under nitrogen. The reaction mixture was heated at  $60\text{ }^\circ\text{C}$  for 6 h and monitored by ESI-MS. It was then diluted with  $\text{CH}_2\text{Cl}_2$  (50 mL) and washed with saturated NaCl solution. The organic layer was dried over anhydrous  $\text{MgSO}_4$ . After evaporation of the solvent and purification *via* column chromatography with ethylacetate-hexane (10 : 90, silica gel) 259 mg of **1** (yield 93%) were afforded as a colourless solid. mp  $252\text{--}254\text{ }^\circ\text{C}$ .  $^1\text{H}$  NMR ( $[\text{D}_2]$ Dichloromethane, 400 MHz):  $\delta = 8.49$  (s, 2H), 7.89 (s, 2H), 7.28–7.30 (m, 6H), 7.17 (dd,  $J = 7.4, 2.0$  Hz, 4H), 7.00 (s, 4H), 2.37 (s, 6H), 2.05 ppm (s, 12H).  $^{13}\text{C}$  NMR ( $[\text{D}_2]$ Dichloromethane, 100 MHz):  $\delta = 162.5, 145.1, 138.8, 137.9, 137.4, 136.3, 131.9, 129.0, 128.7, 128.2, 127.6, 126.8, 123.0, 120.3, 95.3, 87.1, 21.3, 20.0$  ppm. IR (KBr):  $\nu = 2951, 2917, 2855, 2360, 1614, 1404\text{ cm}^{-1}$ . MS (ESI):  $m/z$  (%)  $[\text{C}_{46}\text{H}_{36}\text{N}_2 + \text{H}]^+$ : Calcd. 617.3, found 617.4. Elemental analysis, calcd. (%) for  $\text{C}_{46}\text{H}_{36}\text{N}_2$ : C 89.58, H 5.88, N 4.54; found C 88.99, H 5.87, N 4.49.

<sup>2</sup> M. Schmittel, C. Michel and A. Wiegrefe, *Synthesis*, 2005, 367.

<sup>3</sup> M. Schmittel, V. Kalsani, P. Mal and J. W. Bats, *Inorg. Chem.*, 2006, **45**, 6370.

**Figure S1.**  $^1\text{H}$  NMR spectrum of **1** ( $[\text{D}_2]$ Dichloromethane, 400 MHz).

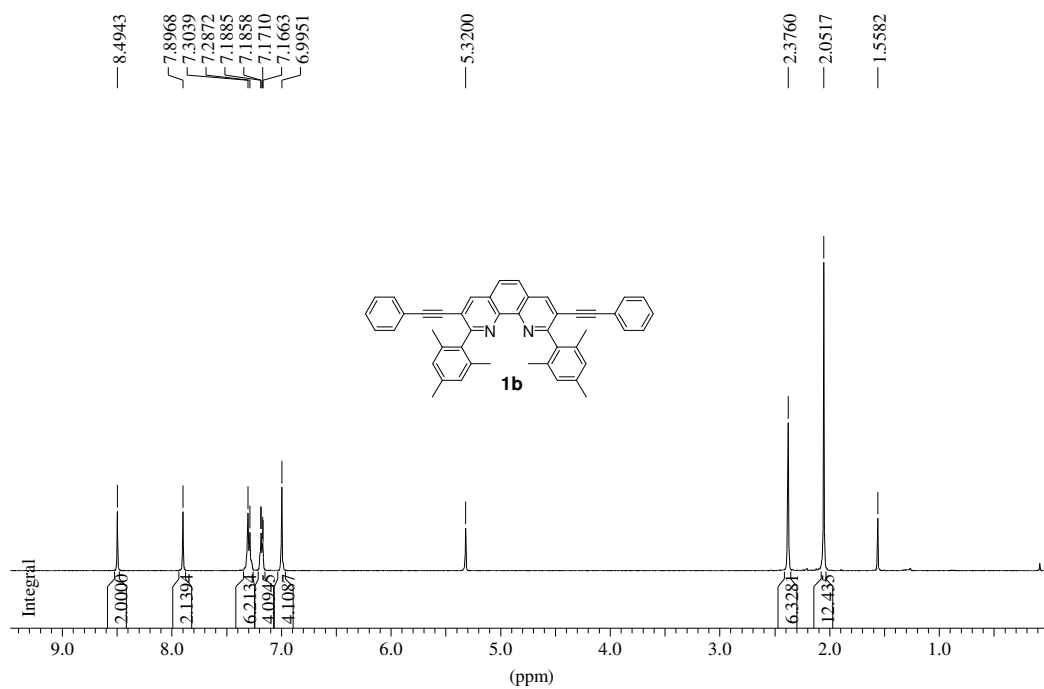

**Figure S2.**  $^{13}\text{C}$  NMR spectrum of **1** ( $[\text{D}_2]$ Dichloromethane, 100 MHz).

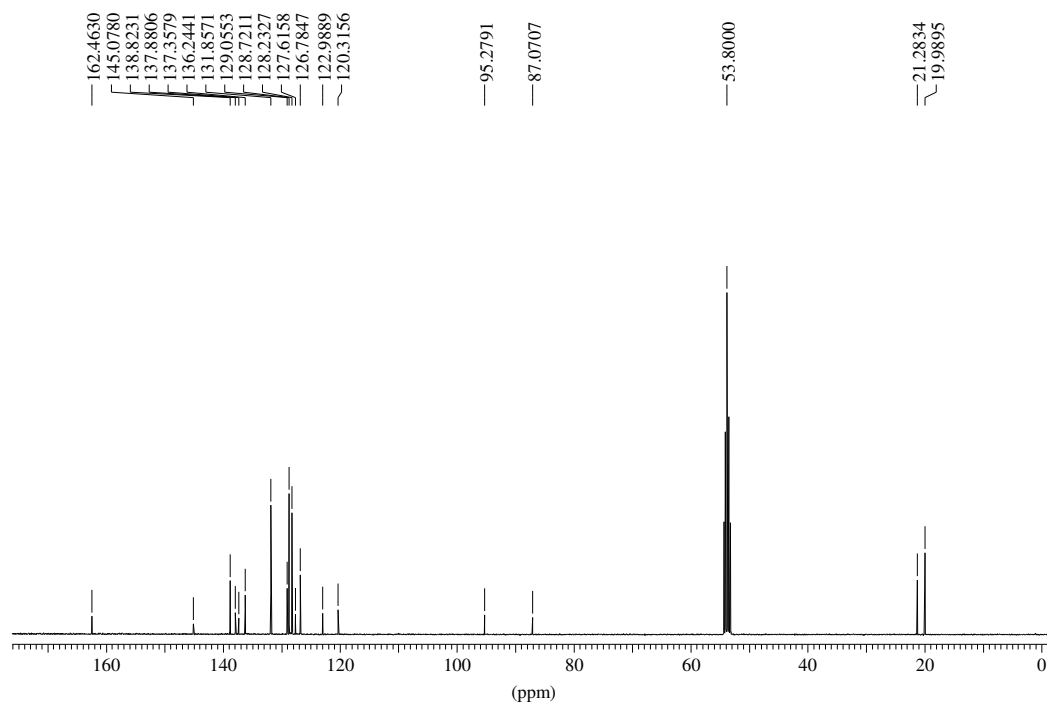

**Figure S3.**  $^1\text{H}$  NMR spectra (400 MHz) of **3** (top) and **3** + methanesulfonic acid (bottom: 5.0 equivalents of methanesulfonic acid were used) in  $\text{CD}_2\text{Cl}_2\text{-CD}_3\text{OD}$  (4:1).

**3**

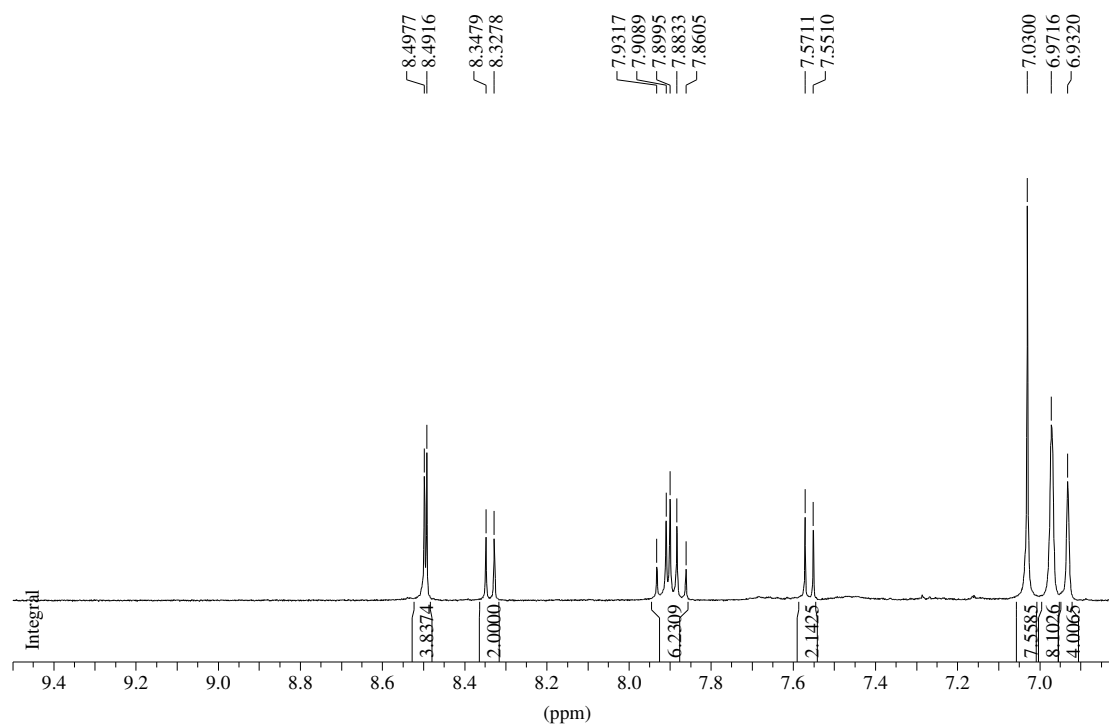

**3 + H<sup>+</sup>**

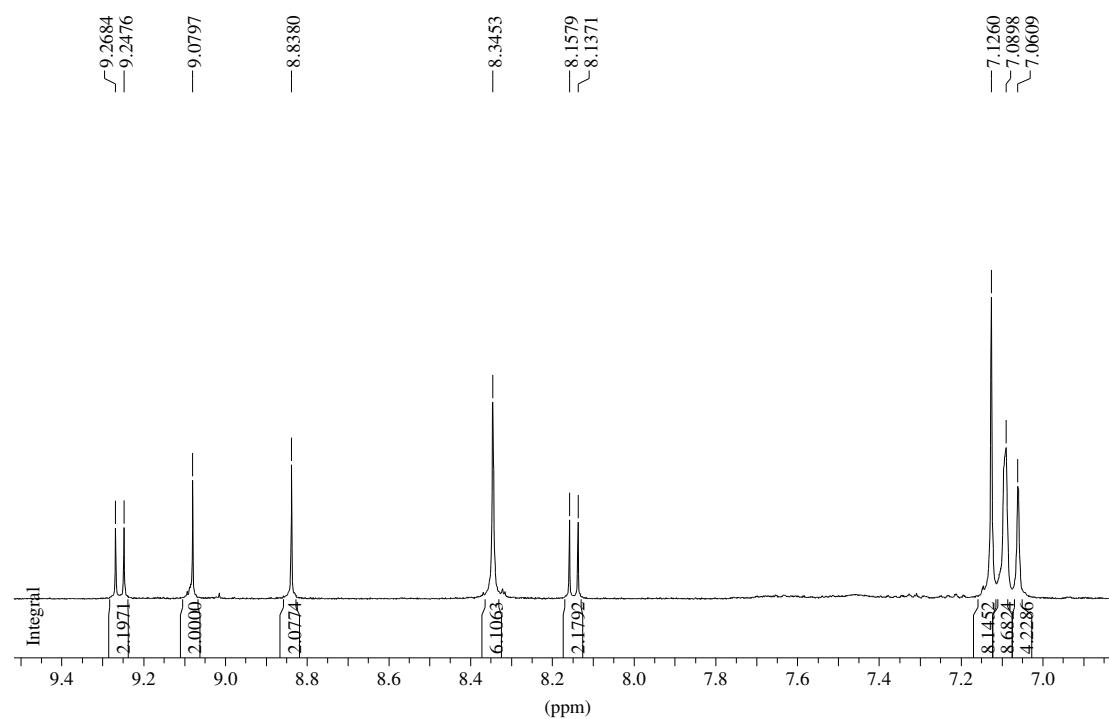

**Figure S4.** UV-Vis and luminescence spectra of **1** ( $1.0 \times 10^{-5}$  M) upon progressive addition of methanesulfonic acid ( $1.0 \times 10^{-3}$  M) in  $\text{CH}_2\text{Cl}_2$ -MeOH (4:1) at rt (a total of 2.0 equivalents of acid was added). Excitation wavelength: 308 nm.

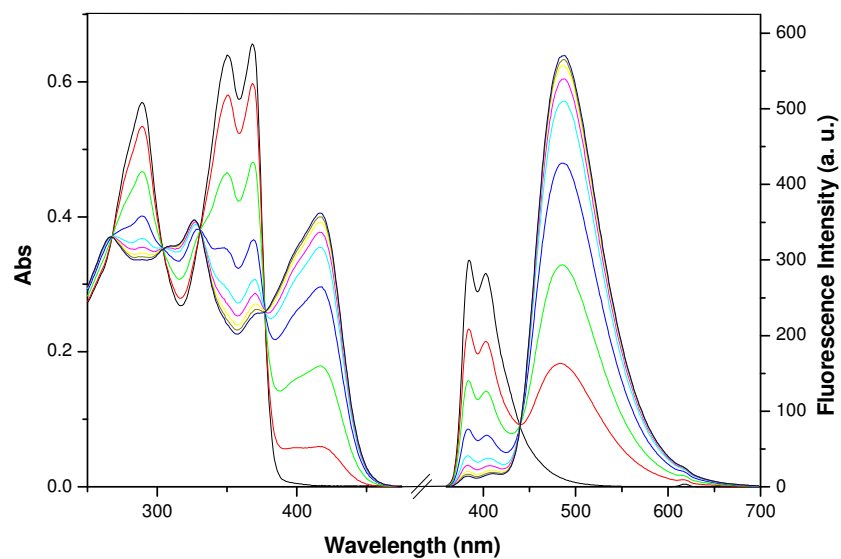

**Figure S5.** UV-Vis and luminescence spectra of **2** ( $1.0 \times 10^{-5}$  M) upon progressive addition of methanesulfonic acid ( $1.0 \times 10^{-3}$  M) in  $\text{CH}_2\text{Cl}_2$ -MeOH (4:1) at rt (a total of 3.0 equivalents of acid was added). Excitation wavelength: 275 nm.

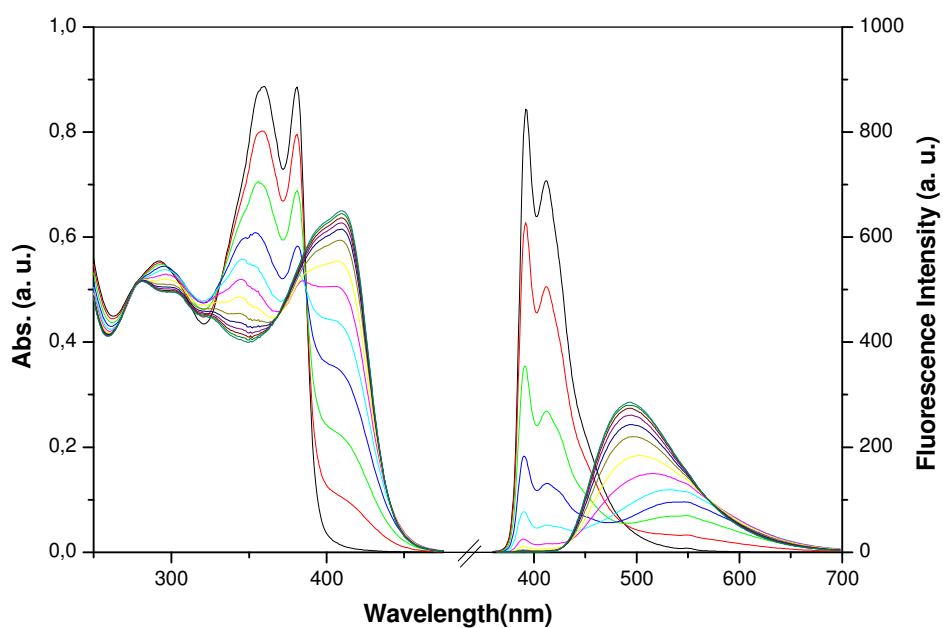

**Figure S6.** The speciation curves of **2** in presence of methanesulfonic acid.

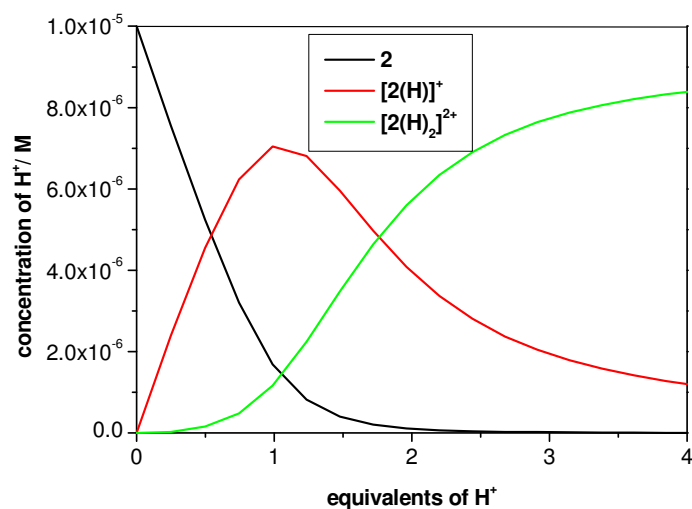

**Figure S7.** UV-Vis and luminescence spectra of **3** ( $1.0 \times 10^{-5}$  M) upon progressive addition of methanesulfonic acid ( $1.0 \times 10^{-3}$  M) in  $\text{CH}_2\text{Cl}_2$ -MeOH (4:1) at rt (a total of 4.0 equivalents of acid was added). Excitation wavelength: 330 nm.

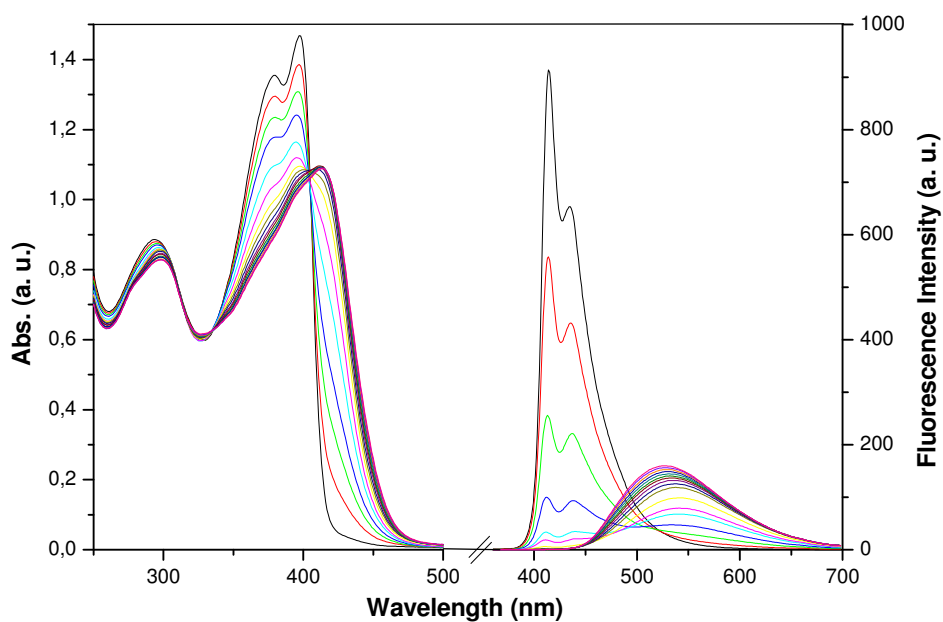

**Figure S8.** Change in the luminescence intensity of **3** ( $1.0 \times 10^{-5}$  M) at 414 nm upon addition of methanesulfonic acid ( $1.0 \times 10^{-3}$  M) in  $\text{CH}_2\text{Cl}_2$ -MeOH (4:1) at rt. Excitation wavelength: 330 nm.

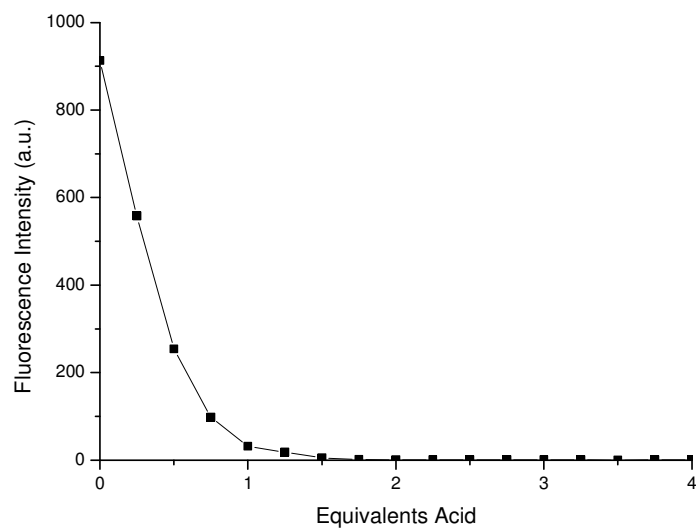

**Figure S9.** The speciation curves of **3** in presence of methanesulfonic acid.

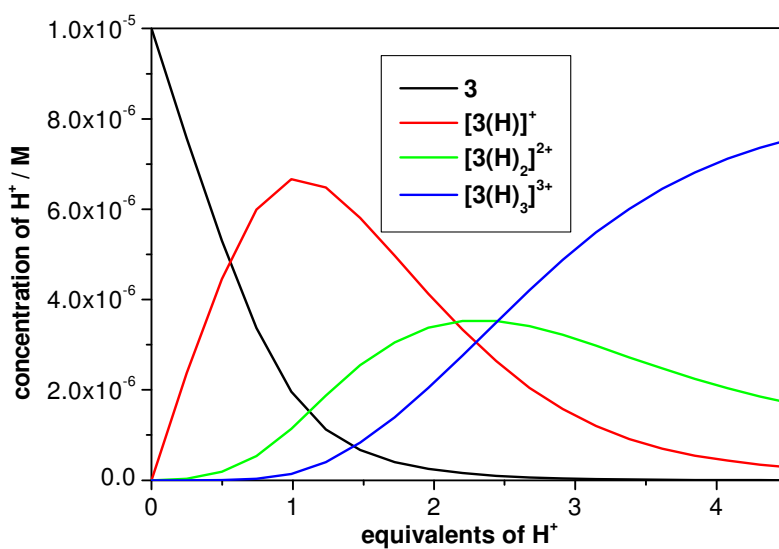



**Figure S10.** Luminescence spectra of **1** ( $2.0 \times 10^{-5}$  M) upon progressive addition of methanesulfonic acid ( $2.0 \times 10^{-3}$  M) and 1,4-benzoquinone ( $1 \times 10^{-3}$  M) in  $\text{CH}_2\text{Cl}_2$ -MeOH (4:1) at rt. Excitation wavelength: 308 nm.

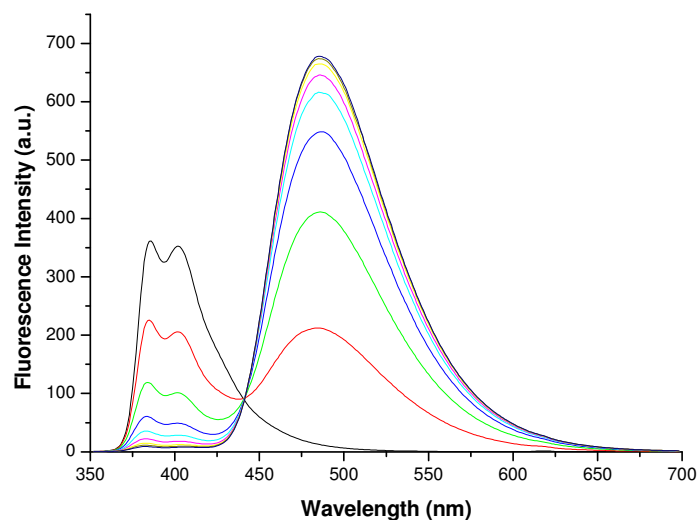

**Figure S11.** Luminescence spectra of a mixture of **3** ( $1.0 \times 10^{-5}$  M) and 1,4-hydroquinone ( $3.0 \times 10^{-5}$  M) upon progressive addition of tris(4-bromophenyl)aminium hexachloroantimonate ( $5.0 \times 10^{-3}$  M) in  $\text{CH}_2\text{Cl}_2$ -MeOH (4:1) at rt. Excitation wavelength: 330 nm.

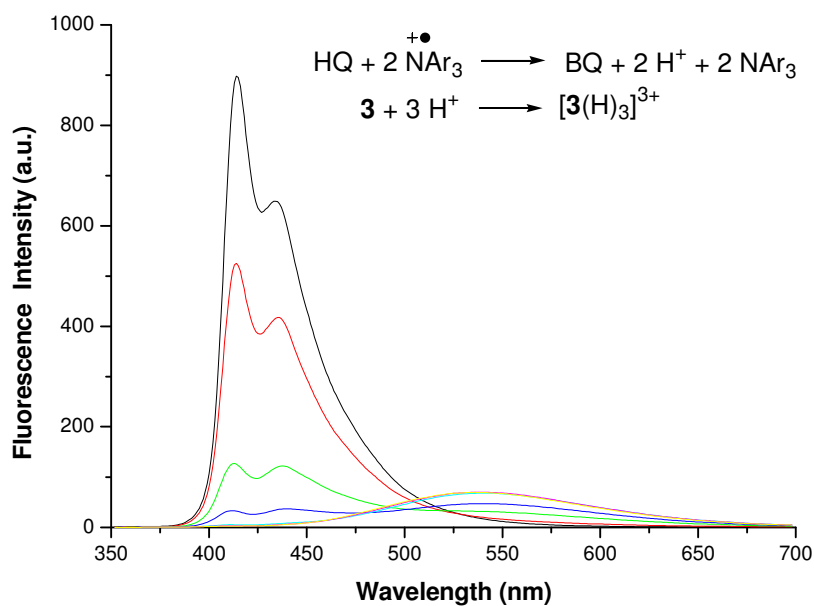

**Figure S12.** The schematic diagram of the 3-input AND – NOR – OR circuit and its operating truth table (a) on the basis of fundamental 2-input gates, and (b) on the basis of non-fundamental 3-input gates.

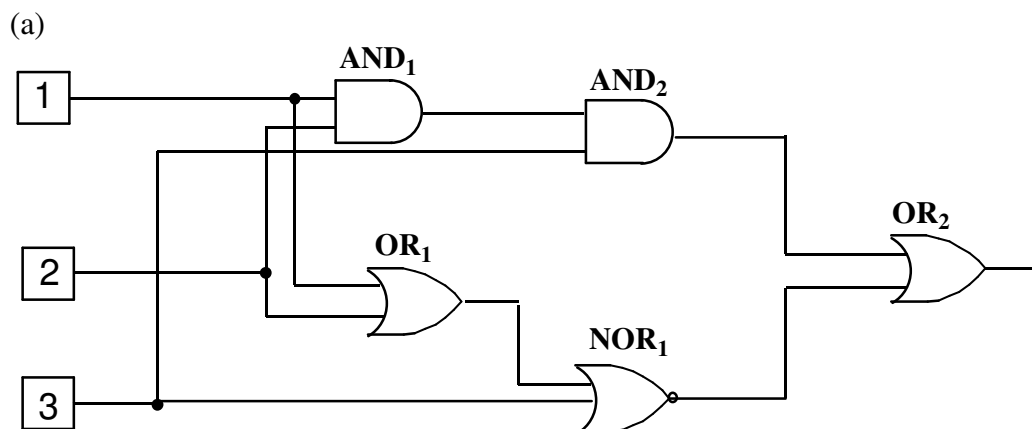

| Input 1 | Input 2 | Input 3 | AND <sub>1</sub> | AND <sub>2</sub> | OR <sub>1</sub> | NOR <sub>1</sub> | OR <sub>2</sub> |
|---------|---------|---------|------------------|------------------|-----------------|------------------|-----------------|
| 0       | 0       | 0       | 0                | 0                | 0               | 1                | 1               |
| 0       | 0       | 1       | 0                | 0                | 0               | 0                | 0               |
| 0       | 1       | 0       | 0                | 0                | 1               | 0                | 0               |
| 0       | 1       | 1       | 0                | 0                | 1               | 0                | 0               |
| 1       | 0       | 0       | 0                | 0                | 1               | 0                | 0               |
| 1       | 0       | 1       | 0                | 0                | 1               | 0                | 0               |
| 1       | 1       | 0       | 1                | 0                | 1               | 0                | 0               |
| 1       | 1       | 1       | 1                | 1                | 1               | 0                | 1               |

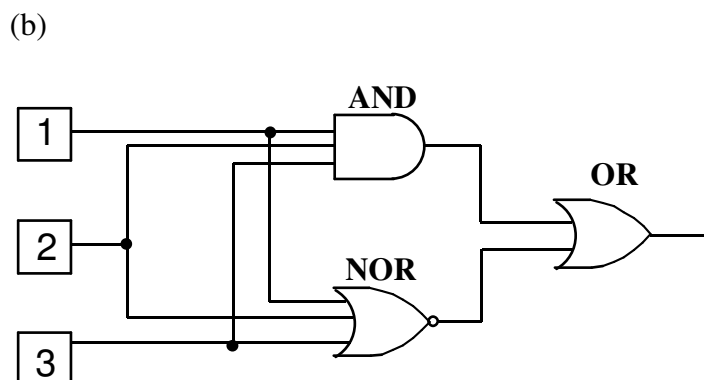

| Input 1 | Input 2 | Input 3 | AND | NOR | OR |
|---------|---------|---------|-----|-----|----|
| 0       | 0       | 0       | 0   | 1   | 1  |
| 0       | 0       | 1       | 0   | 0   | 0  |
| 0       | 1       | 0       | 0   | 0   | 0  |
| 0       | 1       | 1       | 0   | 0   | 0  |
| 1       | 0       | 0       | 0   | 0   | 0  |
| 1       | 0       | 1       | 0   | 0   | 0  |
| 1       | 1       | 0       | 0   | 0   | 0  |
| 1       | 1       | 1       | 1   | 0   | 1  |

**Table S1.** Calculation of the intensity of each protonated species of **2** (normalised).

**1 equiv. of acid added**

| Detected species | % (Calculated from speciation curve) | $I_{em}^a$<br>(a. u.)    | $I_{em-norm.} = I_{em} / \%$<br>(a. u.) | $I_{em-norm.}/I_{em}^{00b}$ |
|------------------|--------------------------------------|--------------------------|-----------------------------------------|-----------------------------|
| <b>2</b>         | 0.16                                 | 58 ( $\lambda = 389$ nm) | 362                                     | 1                           |
| $[2(H)]^+$       | 0.70                                 | 83 ( $\lambda = 530$ nm) | 118                                     | 0.14                        |
| $[2(H)_2]^{2+}$  | 0.13                                 | 30 ( $\lambda = 484$ nm) | 231                                     | 0.27                        |

**2 equiv. of acid added**

| Detected species | % (Calculated from speciation curve) | $I_{em}^a$<br>(a. u.)     | $I_{em-norm.} = I_{em} / \%$<br>(a. u.) | $I_{em-norm.}/I_{em}^{00b}$ |
|------------------|--------------------------------------|---------------------------|-----------------------------------------|-----------------------------|
| <b>2</b>         | 0.02                                 | --                        | --                                      | --                          |
| $[2(H)]^+$       | 0.38                                 | 33 ( $\lambda = 530$ nm)  | 87                                      | 0.10                        |
| $[2(H)_2]^{2+}$  | 0.60                                 | 169 ( $\lambda = 484$ nm) | 282                                     | 0.33                        |

**3 equiv. of acid added**

| Detected species | % (Calculated from speciation curve) | $I_{em}^a$<br>(a. u.)     | $I_{em-norm.} = I_{em} / \%$<br>(a. u.) | $I_{em-norm.}/I_{em}^{00b}$ |
|------------------|--------------------------------------|---------------------------|-----------------------------------------|-----------------------------|
| <b>2</b>         | 0                                    | --                        | --                                      | --                          |
| $[2(H)]^+$       | 0.18                                 | 20 ( $\lambda = 530$ nm)  | 111                                     | 0.13                        |
| $[2(H)_2]^{2+}$  | 0.80                                 | 242 ( $\lambda = 484$ nm) | 302                                     | 0.36                        |

<sup>a</sup> Intensity data for each species after deconvolution, <sup>b</sup>  $I_{em}^{00} = 843$  a. u. ( $\lambda = 392$  nm)

**Table S2.** (a) XNOR logic operation of **2** with progressive addition of methanesulfonic acid  
(b) truth table of a molecular XNOR gate

(a)

| entry | substrate | $\lambda_{max}^{em}$<br>/nm | $I_{em}/I_o^{[a]}$ | output <sup>[b]</sup> |
|-------|-----------|-----------------------------|--------------------|-----------------------|
| 1     | 00        | 392                         | $\approx 1.00$     | 1                     |
| 2     | 10/01     | 531                         | $0.12 \pm 0.03$    | 0                     |
| 3     | 11        | 494                         | $0.32 \pm 0.04$    | 1                     |

(b)

| Input 1 | Input 2 | XNOR |
|---------|---------|------|
| 0       | 0       | 1    |
| 0       | 1       | 0    |
| 1       | 0       | 0    |
| 1       | 1       | 1    |

**Table S3.** Calculation of the intensity of each protonated species of **3** (normalised).

**1 equiv. of acid added**

| Detected species                       | % (Calculated from speciation curve) | $I_{em}^a$<br>(a. u.)    | $I_{em-norm.} = I_{em} / \%$<br>(a. u.) | $I_{em-norm.}/I_{em}^{000b}$ |
|----------------------------------------|--------------------------------------|--------------------------|-----------------------------------------|------------------------------|
| <b>3</b>                               | 0.20                                 | 32 ( $\lambda = 411$ nm) | 160                                     | 1                            |
| <b>[3(H)]<sup>+</sup></b>              | 0.67                                 | 46 ( $\lambda = 534$ nm) | 69                                      | 0.076                        |
| <b>[3(H)<sub>2</sub>]<sup>2+</sup></b> | 0.12                                 | 8 ( $\lambda = 636$ nm)  | 67                                      | 0.073                        |
| <b>[3(H)<sub>3</sub>]<sup>3+</sup></b> | 0.01                                 | --                       | --                                      | --                           |

**2 equiv. of acid added**

| Detected species                       | % (Calculated from speciation curve) | $I_{em}^a$<br>(a. u.)    | $I_{em-norm.} = I_{em} / \%$<br>(a. u.) | $I_{em-norm.}/I_{em}^{000b}$ |
|----------------------------------------|--------------------------------------|--------------------------|-----------------------------------------|------------------------------|
| <b>3</b>                               | 0.02                                 | --                       | --                                      | --                           |
| <b>[3(H)]<sup>+</sup></b>              | 0.40                                 | 28 ( $\lambda = 534$ nm) | 70                                      | 0.077                        |
| <b>[3(H)<sub>2</sub>]<sup>2+</sup></b> | 0.34                                 | 22 ( $\lambda = 635$ nm) | 65                                      | 0.071                        |
| <b>[3(H)<sub>3</sub>]<sup>3+</sup></b> | 0.22                                 | 56 ( $\lambda = 518$ nm) | 254                                     | (0.28) <sup>c</sup>          |

**3 equiv. of acid added**

| Detected species                       | % (Calculated from speciation curve) | $I_{em}^a$<br>(a. u.)     | $I_{em-norm.} = I_{em} / \%$<br>(a. u.) | $I_{em-norm.}/I_{em}^{000b}$ |
|----------------------------------------|--------------------------------------|---------------------------|-----------------------------------------|------------------------------|
| <b>3</b>                               | 0                                    | --                        | --                                      | --                           |
| <b>[3(H)]<sup>+</sup></b>              | 0.15                                 | 10 ( $\lambda = 535$ nm)  | 67                                      | 0.073                        |
| <b>[3(H)<sub>2</sub>]<sup>2+</sup></b> | 0.32                                 | 20 ( $\lambda = 634$ nm)  | 63                                      | 0.069                        |
| <b>[3(H)<sub>3</sub>]<sup>3+</sup></b> | 0.51                                 | 118 ( $\lambda = 517$ nm) | 231                                     | 0.25                         |

**4.0 equiv. of acid added**

| Detected species                       | % (Calculated from speciation curve) | $I_{em}^a$<br>(a. u.)     | $I_{em-norm.} = I_{em} / \%$<br>(a. u.) | $I_{em-norm.}/I_{em}^{000b}$ |
|----------------------------------------|--------------------------------------|---------------------------|-----------------------------------------|------------------------------|
| <b>3</b>                               | 0                                    | --                        | --                                      | --                           |
| <b>[3(H)]<sup>+</sup></b>              | 0.05                                 | 3.4 ( $\lambda = 535$ nm) | 68                                      | 0.074                        |
| <b>[3(H)<sub>2</sub>]<sup>2+</sup></b> | 0.22                                 | 14 ( $\lambda = 634$ nm)  | 64                                      | 0.070                        |
| <b>[3(H)<sub>3</sub>]<sup>3+</sup></b> | 0.72                                 | 141 ( $\lambda = 518$ nm) | 196                                     | 0.21                         |

<sup>a</sup> Intensity data for each species after deconvolution, <sup>b</sup>  $I_{em}^{000} = 913$  ( $\lambda = 414$  nm), <sup>c</sup> This value was not used for the determination of the arithmetic mean value of  $I_{em-norm.}/I_{em}^{000}$  of **[3(H)<sub>3</sub>]<sup>3+</sup>**.
